# Supplementary material for: The Uptake Characteristics of Prussian-Blue Nanoparticles for Platinum-Group Metal and Molybdenum Ions in a Nitric Acid Solution Toward Application for the Recovery of Precious Metals from Nuclear and Electronic Wastes
Source: Research Square preprint supplement (doi:10.21203/rs.3.rs-1120544/v1), 2022-01-03
Supplement: Supplementary file 1 [file 5cdb6ed5e12e2b31788a70d8.pdf]

**Table 1.** The sorption efficiency of PGMs/Mo ions into PBNPs, the elution efficiency of Fe ion from PBNPs after 24 h sorption test, the substitution efficiency of PGMs/Mo with Fe<sup>2+</sup> or Fe<sup>3+</sup> ion, the substitution site, and the amount of recovery per 1 g PB.

|                                   | Ru               | Rh               | Pd               | Mo                                 |
|-----------------------------------|------------------|------------------|------------------|------------------------------------|
| Sorption efficiency [%]           | 33.1             | 68.2             | 99.9             | 51.7                               |
| Elution efficiency of Fe ion [%]  | 19.5             | 23.9             | 43.5             | 17.1                               |
| Substitution efficiency [%]       | 39.0             | 47.8             | 87.0             | 17.1                               |
| Substitution site                 | Fe <sup>3+</sup> | Fe <sup>3+</sup> | Fe <sup>2+</sup> | Fe <sup>2+</sup> /Fe <sup>3+</sup> |
| Amount of recovery per 1g PB* [g] | 0.128            | 0.160            | 0.302            | 0.107                              |

\*Chemical form: KFe(III)[Fe(II)(CN)<sub>6</sub>]

$$\text{Sorption efficiency [\%]} = [(C_{\text{initial}} - C_{\text{final}})/C_{\text{initial}}] \times 100$$

Here,  $C_{\text{initial}}$  and  $C_{\text{final}}$  denote the concentration of Pd ion in nitric acid solution before and after 24-h sorption test, respectively.

**Table 2.** The crystallite size and lattice constant of the pristine and PGMs/Mo-sorbed PBNPs.

|              | Crystallite size [nm] | Lattice constant [Å] |
|--------------|-----------------------|----------------------|
| Pristine PB  | 16.1                  | 10.16                |
| Ru-sorbed PB | 16.3                  | 10.21                |
| Rh-sorbed PB | 16.7                  | 10.21                |
| Pd-sorbed PB | 16.7                  | 10.21                |
| Mo-sorbed PB | 16.7                  | 10.21                |

**Table 3.** The adsorption energy, diffusion barrier, and substitution energy of PGMs/Mo ions when incorporated into PB unit cells.

|                  | Adsorption energy [eV] | Diffusion barrier [eV] | Substitution energy [eV]                              |
|------------------|------------------------|------------------------|-------------------------------------------------------|
| Ru <sup>4+</sup> | 1.8                    | 4.0                    | − 1.2 (Fe <sup>2+</sup> ) / − 4.1 (Fe <sup>3+</sup> ) |
| Rh <sup>3+</sup> | 0.2                    | 3.8                    | − 0.9 (Fe <sup>2+</sup> ) / − 1.5 (Fe <sup>3+</sup> ) |
| Pd <sup>2+</sup> | 0                      | 2.5                    | − 0.9 (Fe <sup>2+</sup> ) / + 0.6 (Fe <sup>3+</sup> ) |
| Mo <sup>6+</sup> | 3.2                    | 8.0                    | + 3.8 (Fe <sup>2+</sup> ) / − 2.8 (Fe <sup>3+</sup> ) |
